# Supplementary material for: Single dose, dual antigen RNA vaccines protect against lethal Crimean-Congo haemorrhagic fever virus infection in mice
Source: PubMed Central journal article supplement — eBioMedicine. 2024 Feb 20;101:105017. doi: 10.1016/j.ebiom.2024.105017 (PMC10885550; doi:10.1016/j.ebiom.2024.105017), 2024-02-20

Supplemental Figure 1

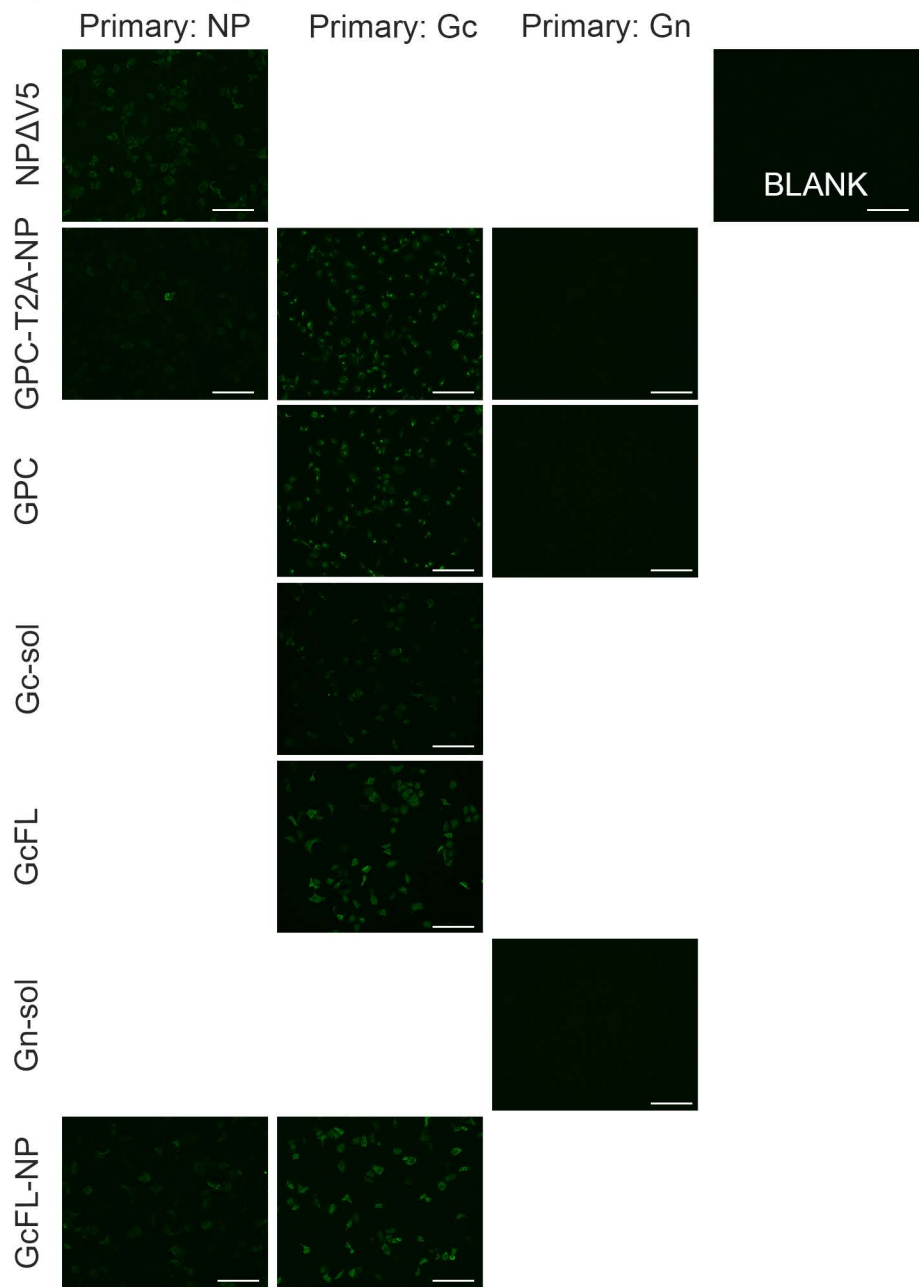

# Supplementary Figure 2

a

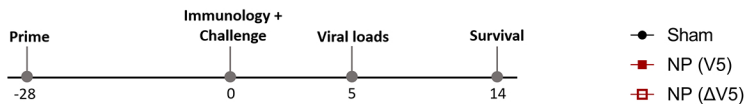

b

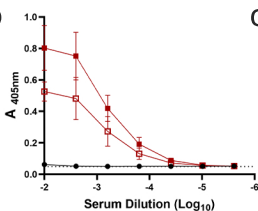

c

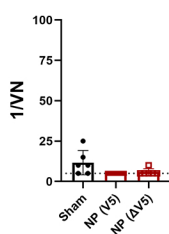

d

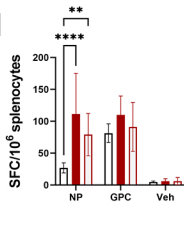

e

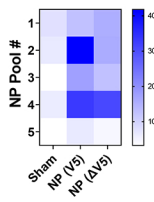

f

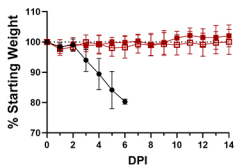

g

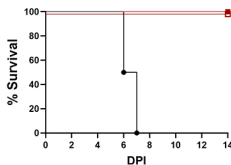

h

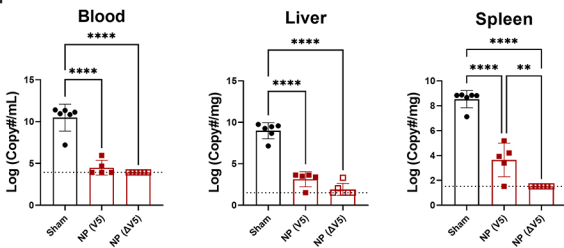

i

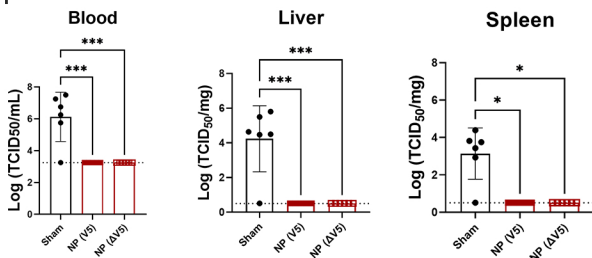

HE

IHC

Sham

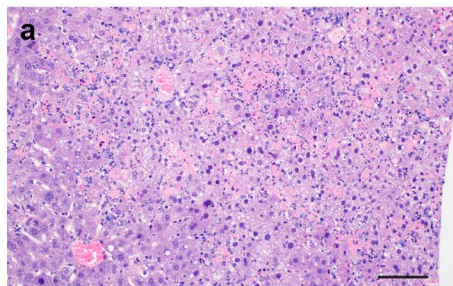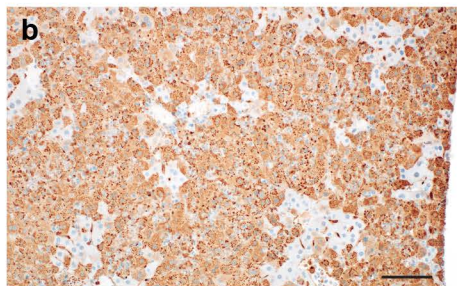NP ( $\Delta V5$ )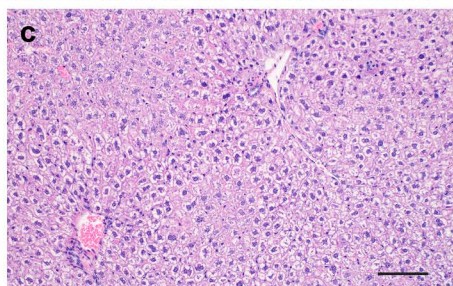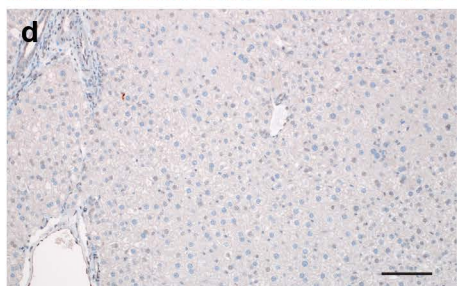

Mixed synthesis

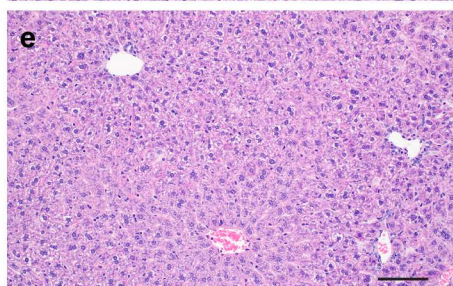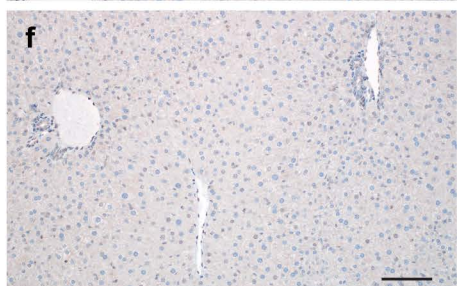NP ( $\Delta V5$ )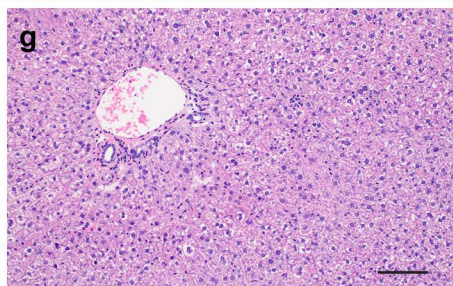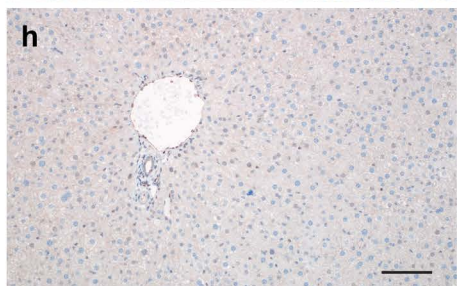

Gc-FL

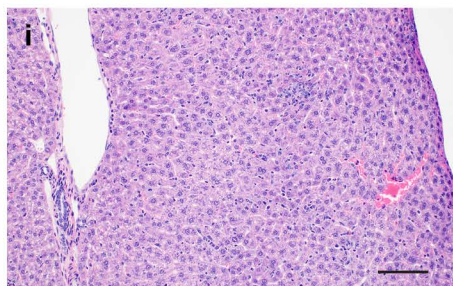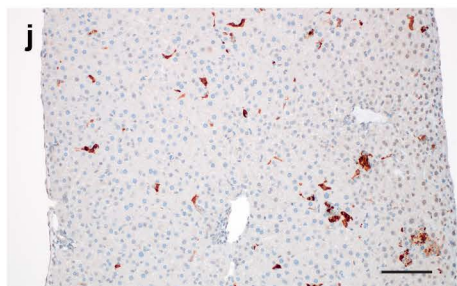

GcFL-NP

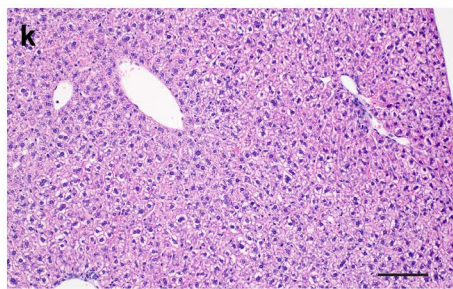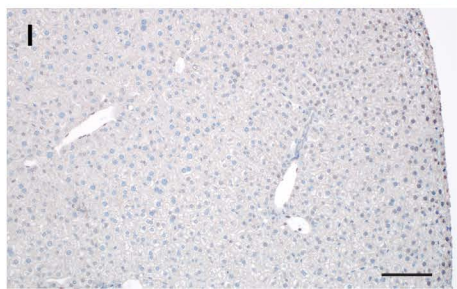

**a**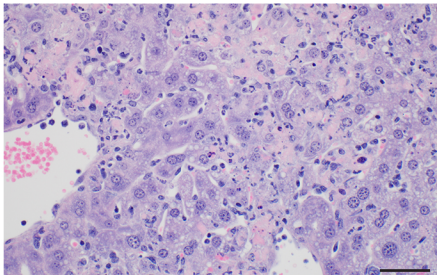**b**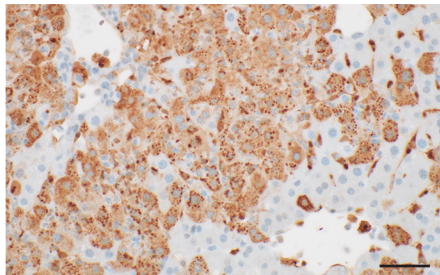**c**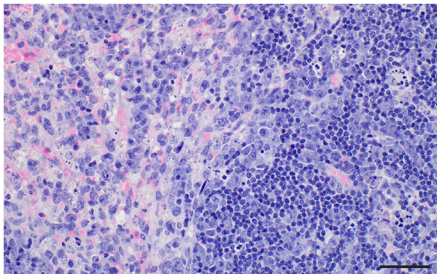**d**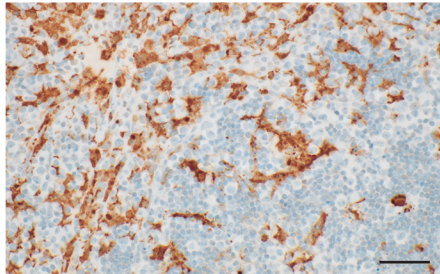

HE

IHC

Sham

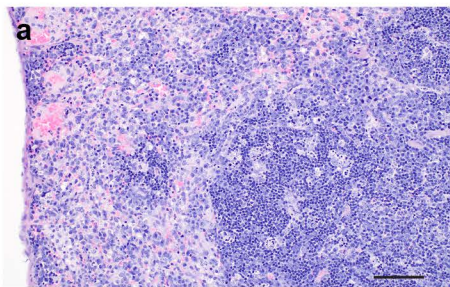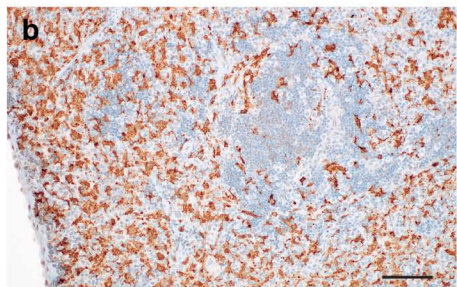

NP (V5)

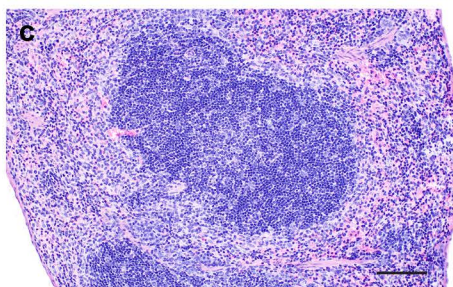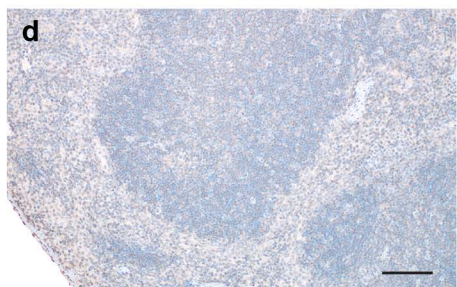

Mixed synthesis

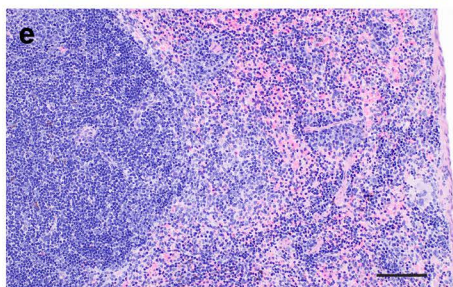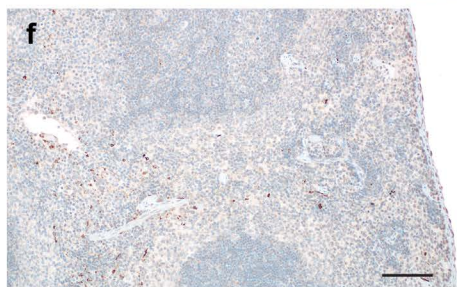NP ( $\Delta$ V5)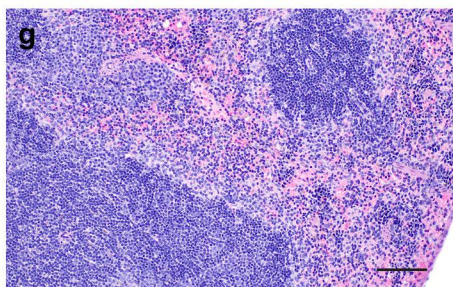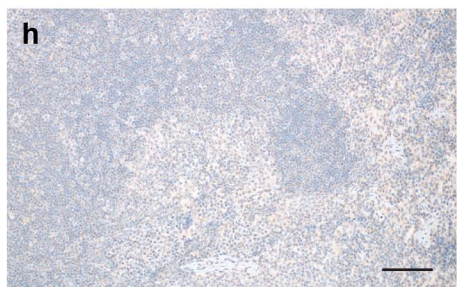

Gc-FL

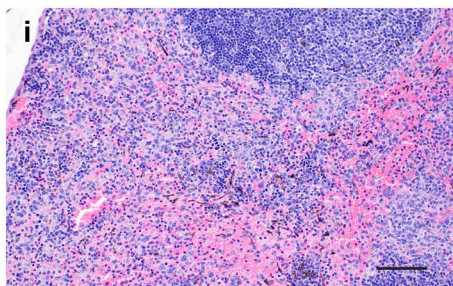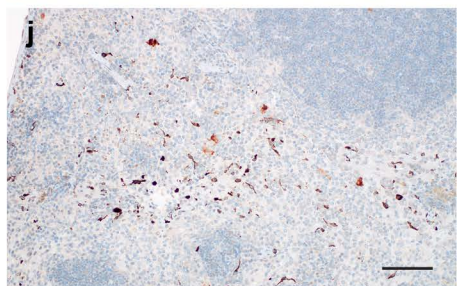

GcFL-NP

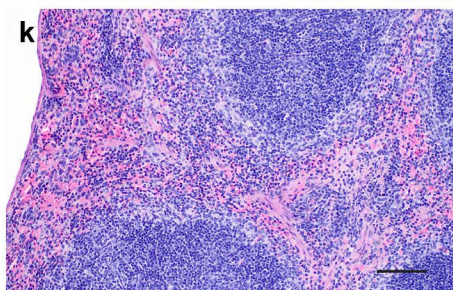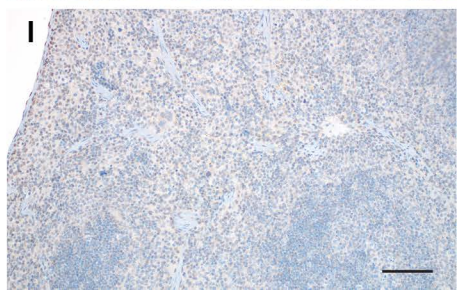

# Supplementary Figure 6

a

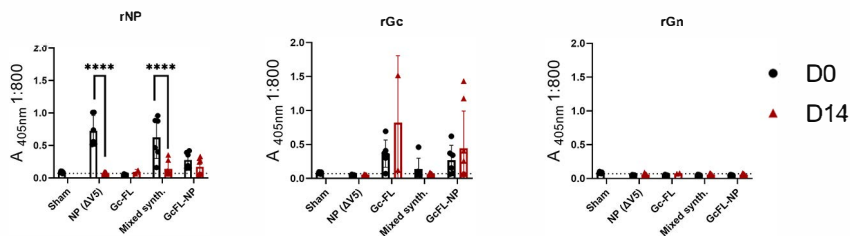

b

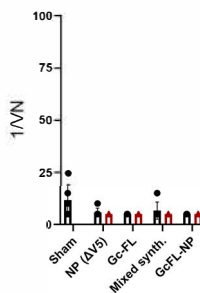

c

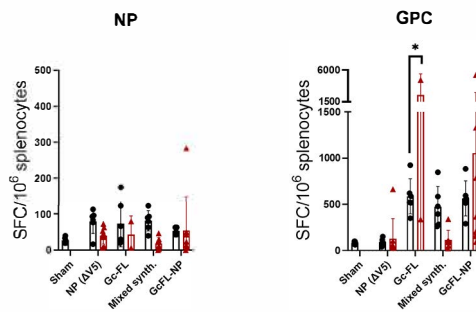

Supplement: mmc1.pdf [file mmc1.pdf]
